# Supplementary material for: Investigation of the adsorption properties of gemcitabine anticancer drug with metal-doped boron nitride fullerenes as a drug-delivery carrier: a DFT study
Source: PubMed Central journal article supplement (PMC8979131; doi:10.1039/d1ra09319c), 2022-01-20
Supplement: RA-012-D1RA09319C-s001.pdf [file RA-012-D1RA09319C-s001.pdf]

## ***Supporting Information***

**Investigation of adsorption properties of gemcitabine anticancer drug with metal-doped boron nitride fullerenes as a drug delivery carrier; DFT Study.**

*Shamsa Bibi \*<sup>1</sup>, Shafiq-Ur-rehman \*<sup>1</sup>, Laryeb Khalid <sup>1</sup>, Ijaz Ahmad Bhatti <sup>1</sup>, Haq Nawaz Bhatti<sup>1</sup>, Javed Iqbal <sup>1</sup>, Fu Quan Bai <sup>2</sup>. Zhang Hong Xing <sup>2</sup>*

*<sup>1</sup>Department of Chemistry, University of Agriculture Faisalabad, Faisalabad 38000, Pakistan.*

*<sup>2</sup>Institute of Theoretical Chemistry and College of Chemistry, Jilin University, Changchun, 130000, China.*

***Corresponding authors\****

*[shamsa.shafiq@uaf.edu.pk](mailto:shamsa.shafiq@uaf.edu.pk)*

*[shafiq.urrehman@uaf.edu.pk](mailto:shafiq.urrehman@uaf.edu.pk)*

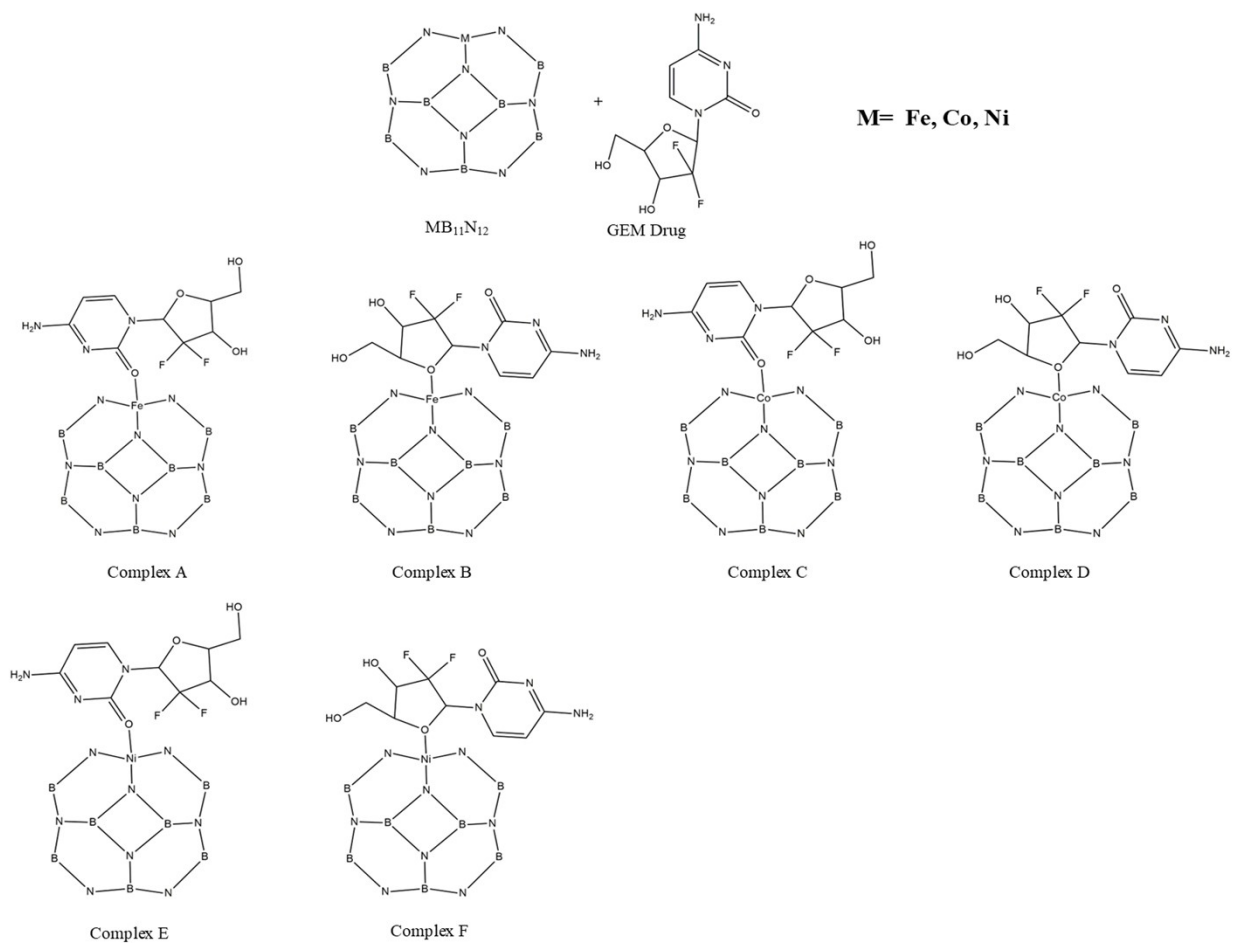

Scheme S1: Scheme of metal doped complexes ( $\text{CoB}_{11}\text{N}_{12}$ ,  $\text{FeB}_{11}\text{N}_{12}$ , and  $\text{NiB}_{11}\text{N}_{12}$ ) after interaction of GEM drug

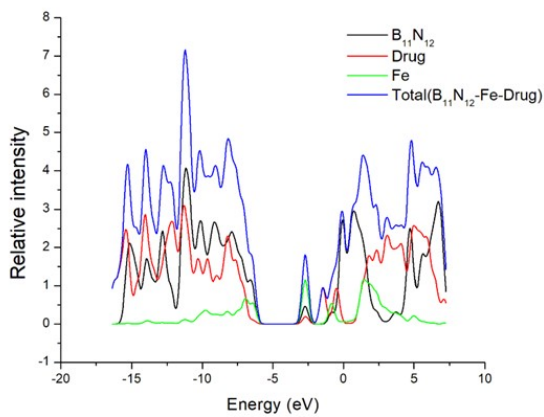

Complex A

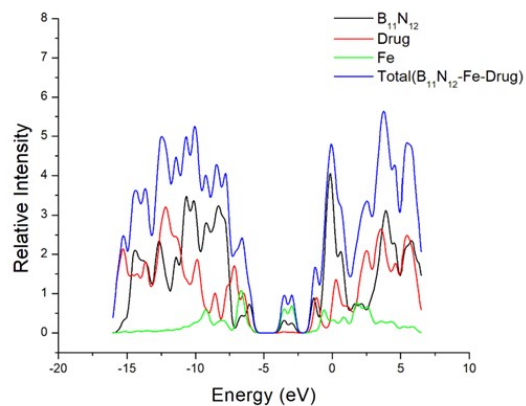

Complex B

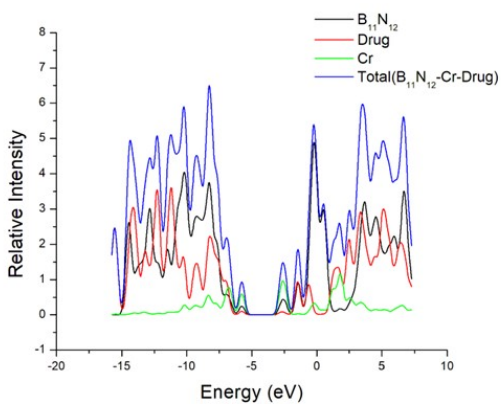

Complex C

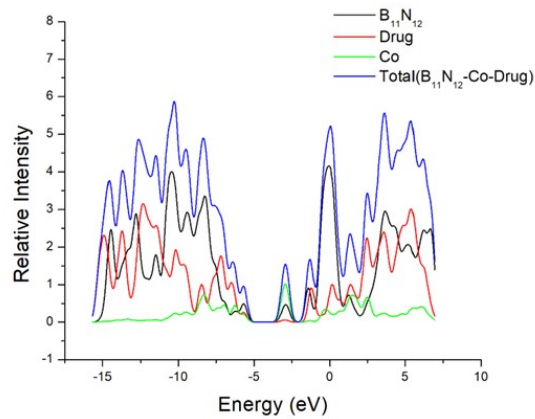

Complex D

Figure S1: DOS spectra of investigated complexes.

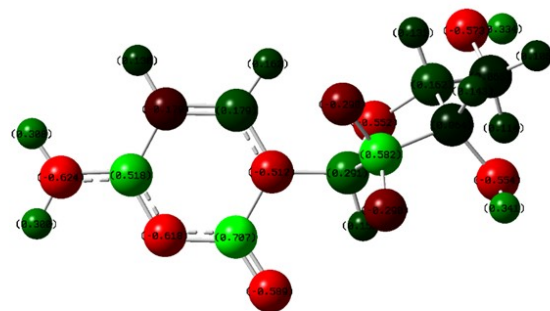

GEM-Drug

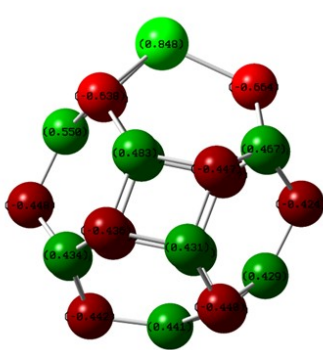

Fe-B11N12

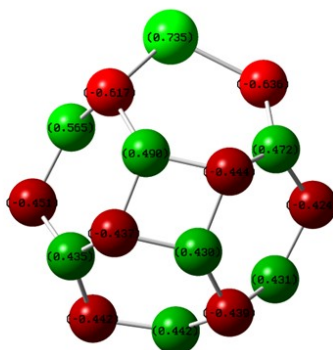

Co-B11N12

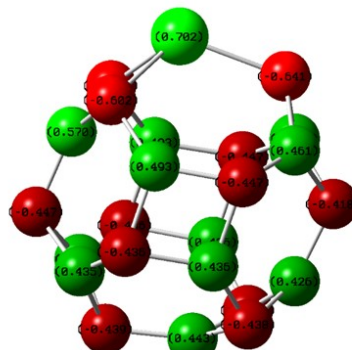

Ni-B11N12

Figure S2: NBO analysis of Drug an metal doped  $B_{11}N_{12}$  before adsorption.

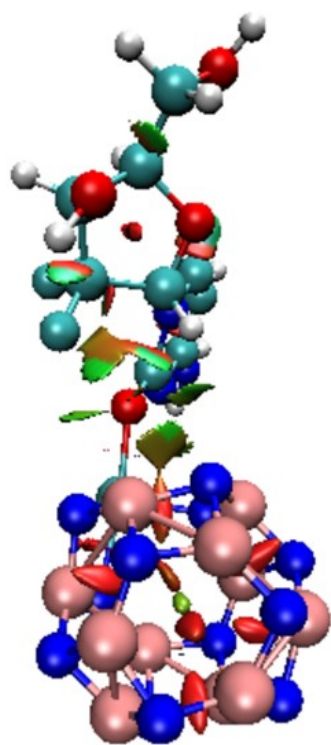

Complex A

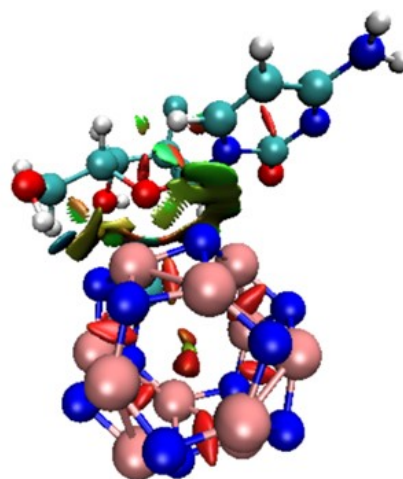

Complex B

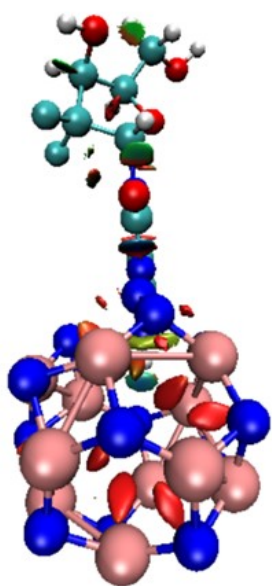

Complex C

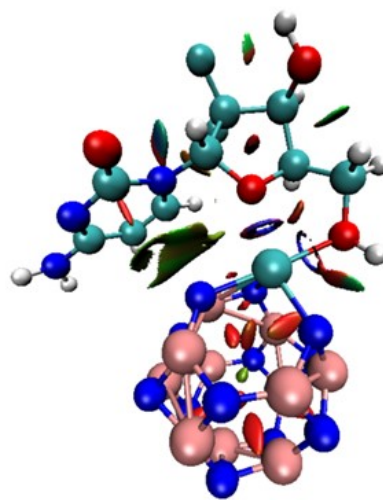

Complex D

Figure S3: NCI analysis of investigated complexes.

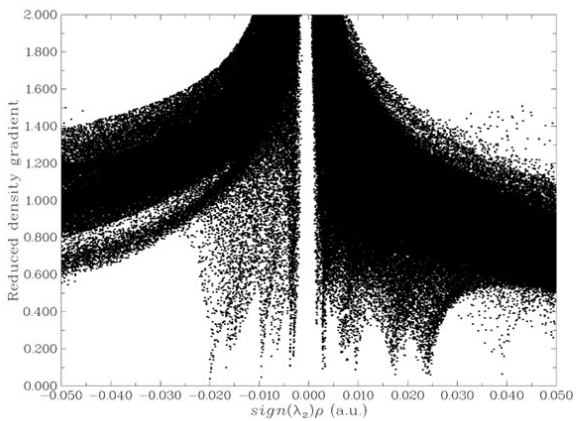

Complex A

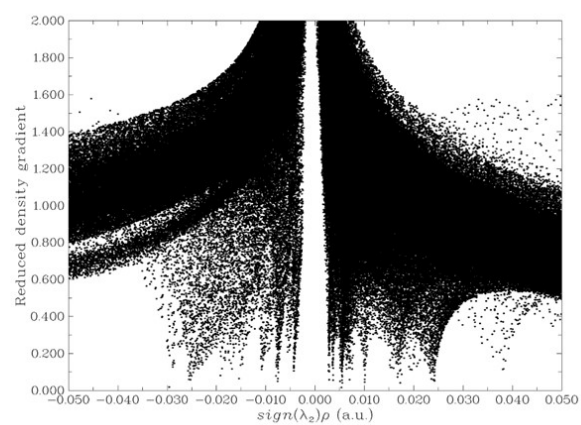

Complex B

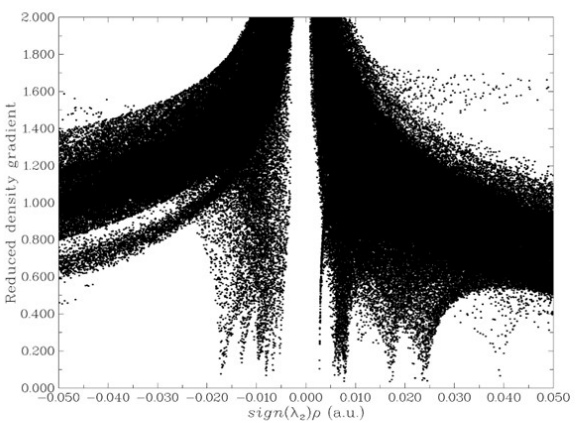

Complex C

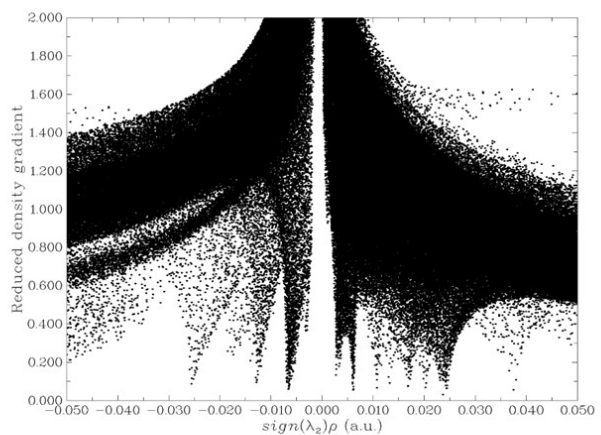

Complex D

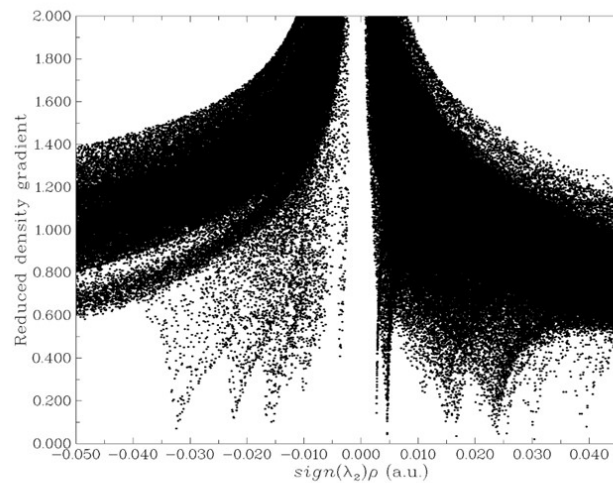

Complex E

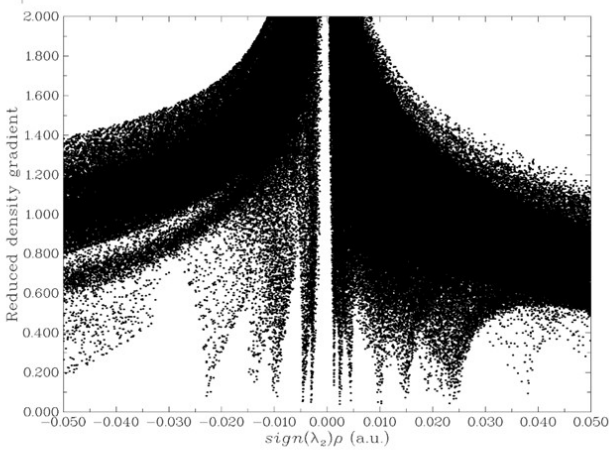

Complex F

Figure S4: RDG plots of GEM drug on interaction with metal doped  $\text{CoB}_{11}\text{N}_{12}$ ,  $\text{FeB}_{11}\text{N}_{12}$ , and  $\text{NiB}_{11}\text{N}_{12}$ .

Table S1: Energy between donor and acceptor for complex A to complex F

|           | Donor NBO                          | Acceptor NBO                       | E <sup>(2)</sup><br>kcal/mol | E <sub>(j)</sub> -E <sub>(i)</sub><br>a.u. | F <sub>(i,j)</sub><br>a.u. |
|-----------|------------------------------------|------------------------------------|------------------------------|--------------------------------------------|----------------------------|
| Complex A | N <sub>1</sub> -B <sub>20</sub>    | B <sub>23</sub>                    | 13.15                        | 0.63                                       | 0.088                      |
|           | N <sub>1</sub> -B <sub>20</sub>    | Fe <sub>24</sub>                   | 11.03                        | 0.87                                       | 0.088                      |
|           | N <sub>11</sub> -B <sub>13</sub>   | N <sub>12</sub> -B <sub>18</sub>   | 11.27                        | 1.07                                       | 0.099                      |
| Complex B | N <sub>1</sub> -B <sub>20</sub>    | Fe <sub>24</sub>                   | 9.20                         | 0.89                                       | 0.082                      |
|           | N <sub>11</sub> Fe <sub>24</sub>   | N <sub>12</sub> Fe <sub>24</sub>   | 19.12                        | 0.077                                      | 0.077                      |
|           | N <sub>2</sub> -B <sub>19</sub>    | B <sub>23</sub>                    | 3.68                         | 1.32                                       | 0.063                      |
| Complex C | N <sub>1</sub> -B <sub>17</sub>    | B <sub>23</sub>                    | 8.51                         | 0.56                                       | 0.067                      |
|           | N <sub>1</sub> -Co <sub>24</sub>   | N <sub>2</sub> - Co <sub>24</sub>  | 15.92                        | 0.39                                       | 0.073                      |
|           | N <sub>1</sub> -Co <sub>24</sub>   | N <sub>3</sub> -B <sub>23</sub>    | 5.55                         | 0.63                                       | 0.055                      |
| Complex D | N <sub>1</sub> -B <sub>17</sub>    | Co <sub>24</sub>                   | 16.25                        | 0.70                                       | 0.096                      |
|           | N <sub>8</sub>                     | B <sub>14</sub>                    | 19.37                        | 0.32                                       | 0.072                      |
|           | N <sub>8</sub>                     | B <sub>19</sub>                    | 11.61                        | 0.33                                       | 0.057                      |
| Complex E | N <sub>1</sub>                     | Ni <sub>24</sub>                   | 21.74                        | 0.54                                       | 0.143                      |
|           | N <sub>8</sub>                     | B <sub>14</sub>                    | 8.00                         | 0.35                                       | 0.068                      |
|           | N <sub>12</sub> - Ni <sub>24</sub> | Ni <sub>24</sub>                   | 20.06                        | 0.24                                       | 0.134                      |
| Complex F | O <sub>50</sub>                    | Ni <sub>28</sub> - C <sub>29</sub> | 14.62                        | 0.54                                       | 0.113                      |
|           | O <sub>32</sub>                    | Ni <sub>24</sub>                   | 17.08                        | 0.84                                       | 17.08                      |
|           | N <sub>6</sub>                     | B <sub>17</sub>                    | 10.10                        | 0.33                                       | 0.075                      |

### Complex A

| Center Number | Atomic Number | Atomic Type | Coordinates (Angstroms) |           |           |
|---------------|---------------|-------------|-------------------------|-----------|-----------|
|               |               |             | X                       | Y         | Z         |
| 1             | 7             | 0           | -1.384541               | 1.502016  | -0.677166 |
| 2             | 7             | 0           | -2.463538               | 0.535148  | -2.378489 |
| 3             | 7             | 0           | -3.994889               | 1.813230  | -0.719590 |
| 4             | 7             | 0           | -2.948835               | 1.153966  | 1.588842  |
| 5             | 7             | 0           | -5.225604               | 0.426847  | 0.546036  |
| 6             | 7             | 0           | -3.801735               | -1.277485 | 1.873198  |
| 7             | 7             | 0           | -4.793908               | -2.094259 | 0.024807  |
| 8             | 7             | 0           | -2.234507               | -2.548652 | 0.235838  |
| 9             | 7             | 0           | -3.252498               | -1.918466 | -2.071380 |
| 10            | 7             | 0           | -4.857972               | -0.347067 | -1.906797 |
| 11            | 7             | 0           | -1.011643               | -1.109350 | -0.985547 |
| 12            | 7             | 0           | -1.348325               | -0.521397 | 1.585532  |
| 13            | 5             | 0           | -2.150583               | -2.055990 | -1.157025 |
| 14            | 5             | 0           | -3.531684               | -2.250054 | 0.799617  |
| 15            | 5             | 0           | -4.881669               | -0.908884 | 0.933440  |
| 16            | 5             | 0           | -4.023546               | 1.333786  | 0.701017  |

|    |    |   |           |           |           |
|----|----|---|-----------|-----------|-----------|
| 17 | 5  | 0 | -2.771091 | -0.233088 | 1.889474  |
| 18 | 5  | 0 | -1.308468 | -1.404949 | 0.454691  |
| 19 | 5  | 0 | -3.469242 | -0.487083 | -2.399391 |
| 20 | 5  | 0 | -1.356556 | 0.231563  | -1.434962 |
| 21 | 5  | 0 | -4.517222 | -1.668724 | -1.317184 |
| 22 | 5  | 0 | -4.926190 | 0.669996  | -0.875372 |
| 23 | 5  | 0 | -2.718868 | 1.543659  | -1.309559 |
| 24 | 26 | 0 | -1.000508 | 1.192121  | 1.064339  |
| 25 | 6  | 0 | 2.664787  | 3.719792  | -0.206899 |
| 26 | 6  | 0 | 3.840384  | 3.129980  | -0.772208 |
| 27 | 6  | 0 | 3.902961  | 1.770972  | -0.785427 |
| 28 | 7  | 0 | 2.889245  | 1.027123  | -0.264371 |
| 29 | 6  | 0 | 1.759403  | 1.653173  | 0.271970  |
| 30 | 7  | 0 | 1.669310  | 2.986776  | 0.293258  |
| 31 | 6  | 0 | 2.902498  | -0.462385 | -0.315240 |
| 32 | 8  | 0 | 4.020426  | -0.897940 | -1.031667 |
| 33 | 6  | 0 | 4.999979  | -1.485656 | -0.131324 |
| 34 | 6  | 0 | 4.153766  | -2.148456 | 0.949465  |
| 35 | 6  | 0 | 3.028441  | -1.107348 | 1.101968  |
| 36 | 1  | 0 | 1.978827  | -0.788605 | -0.799019 |
| 37 | 9  | 0 | 3.390424  | -0.176509 | 2.029739  |
| 38 | 9  | 0 | 1.878099  | -1.701105 | 1.513714  |
| 39 | 6  | 0 | 5.907731  | -2.394017 | -0.930756 |
| 40 | 1  | 0 | 5.605156  | -0.687301 | 0.321599  |
| 41 | 8  | 0 | 6.738837  | -1.556290 | -1.722199 |
| 42 | 1  | 0 | 5.286103  | -3.064883 | -1.534174 |
| 43 | 1  | 0 | 6.493952  | -3.008021 | -0.229245 |
| 44 | 7  | 0 | 2.519362  | 5.057631  | -0.155390 |
| 45 | 1  | 0 | 1.653785  | 5.430387  | 0.204982  |
| 46 | 1  | 0 | 3.196808  | 5.681863  | -0.559409 |
| 47 | 8  | 0 | 3.648994  | -3.367587 | 0.459182  |
| 48 | 1  | 0 | 4.691645  | -2.259634 | 1.901037  |
| 49 | 1  | 0 | 2.877019  | -3.606652 | 0.992113  |
| 50 | 8  | 0 | 0.879469  | 0.872019  | 0.723220  |
| 51 | 1  | 0 | 7.157853  | -2.100962 | -2.399565 |
| 52 | 1  | 0 | 4.641148  | 3.726535  | -1.189859 |
| 53 | 1  | 0 | 4.720850  | 1.209027  | -1.217651 |
|    |    |   |           |           |           |

### Complex B

| Center Number | Atomic Number | Atomic Type | Coordinates (Angstroms) |
|---------------|---------------|-------------|-------------------------|
|---------------|---------------|-------------|-------------------------|



|    |    |   | X         | Y         | Z         |
|----|----|---|-----------|-----------|-----------|
| 1  | 7  | 0 | 0.385202  | 0.242341  | -1.168891 |
| 2  | 7  | 0 | 1.537746  | 2.152156  | -1.035112 |
| 3  | 7  | 0 | 2.689302  | 0.315756  | -2.452730 |
| 4  | 7  | 0 | 2.283244  | -1.893420 | -1.102715 |
| 5  | 7  | 0 | 4.494507  | -0.566028 | -1.451384 |
| 6  | 7  | 0 | 3.910013  | -1.559698 | 0.873389  |
| 7  | 7  | 0 | 4.913778  | 0.450468  | 0.910988  |
| 8  | 7  | 0 | 2.734264  | 0.242680  | 2.322092  |
| 9  | 7  | 0 | 3.189765  | 2.405077  | 0.951398  |
| 10 | 7  | 0 | 4.127700  | 1.976184  | -1.047510 |
| 11 | 7  | 0 | 0.952209  | 1.096266  | 1.257172  |
| 12 | 7  | 0 | 1.325496  | -1.512848 | 1.016945  |
| 13 | 5  | 0 | 2.324829  | 1.505587  | 1.664054  |
| 14 | 5  | 0 | 3.891967  | -0.313664 | 1.674231  |
| 15 | 5  | 0 | 4.685872  | -0.677835 | -0.032989 |
| 16 | 5  | 0 | 3.102263  | -0.960849 | -1.816937 |
| 17 | 5  | 0 | 2.599939  | -1.847218 | 0.329384  |
| 18 | 5  | 0 | 1.491643  | -0.226440 | 1.650519  |
| 19 | 5  | 0 | 2.833418  | 2.435172  | -0.489181 |
| 20 | 5  | 0 | 0.725542  | 1.268089  | -0.160319 |
| 21 | 5  | 0 | 4.356392  | 1.668893  | 0.389127  |
| 22 | 5  | 0 | 3.951195  | 0.764910  | -1.806760 |
| 23 | 5  | 0 | 1.528093  | 0.907736  | -1.845242 |
| 24 | 26 | 0 | 0.545355  | -1.472492 | -0.668856 |
| 25 | 6  | 0 | -3.223085 | 3.551597  | 0.680881  |
| 26 | 6  | 0 | -2.751069 | 2.637785  | 1.684648  |
| 27 | 6  | 0 | -2.508054 | 1.363345  | 1.282394  |
| 28 | 7  | 0 | -2.721387 | 0.995071  | -0.009296 |
| 29 | 6  | 0 | -3.247904 | 1.921557  | -0.983271 |
| 30 | 7  | 0 | -3.441612 | 3.207688  | -0.575886 |
| 31 | 6  | 0 | -2.520458 | -0.365526 | -0.496182 |
| 32 | 8  | 0 | -1.632652 | -1.097106 | 0.352418  |
| 33 | 6  | 0 | -2.392498 | -2.124101 | 1.091097  |
| 34 | 6  | 0 | -3.475470 | -2.548044 | 0.108908  |
| 35 | 6  | 0 | -3.835572 | -1.199216 | -0.528639 |
| 36 | 1  | 0 | -2.105759 | -0.290746 | -1.499467 |
| 37 | 9  | 0 | -4.808060 | -0.593657 | 0.209948  |
| 38 | 9  | 0 | -4.308156 | -1.373487 | -1.792038 |
| 39 | 6  | 0 | -1.487681 | -3.233259 | 1.608806  |
| 40 | 1  | 0 | -2.860223 | -1.630037 | 1.952062  |
| 41 | 8  | 0 | -0.654423 | -2.801340 | 2.657847  |
| 42 | 1  | 0 | -0.930339 | -3.671602 | 0.772351  |
| 43 | 1  | 0 | -2.144763 | -4.020339 | 1.999590  |
| 44 | 7  | 0 | -3.480949 | 4.841471  | 1.020413  |

|    |   |   |           |           |           |
|----|---|---|-----------|-----------|-----------|
| 45 | 1 | 0 | -3.702004 | 5.477950  | 0.269799  |
| 46 | 1 | 0 | -3.170453 | 5.219222  | 1.899565  |
| 47 | 8 | 0 | -2.927744 | -3.431254 | -0.844980 |
| 48 | 1 | 0 | -4.352655 | -2.971137 | 0.617412  |
| 49 | 1 | 0 | -3.489831 | -3.398180 | -1.632694 |
| 50 | 8 | 0 | -3.476446 | 1.487601  | -2.104166 |
| 51 | 1 | 0 | 0.166176  | -2.469343 | 2.250028  |
| 52 | 1 | 0 | -2.571031 | 2.943720  | 2.707079  |
| 53 | 1 | 0 | -2.106239 | 0.606073  | 1.943025  |
|    |   |   |           |           |           |

### Complex C

| Center Number | Atomic Number | Atomic Type | Coordinates (Angstroms) |           |           |
|---------------|---------------|-------------|-------------------------|-----------|-----------|
|               |               |             | X                       | Y         | Z         |
| 1             | 7             | 0           | 2.110275                | -2.150620 | -0.345248 |
| 2             | 7             | 0           | 1.566220                | -0.135328 | -1.387742 |
| 3             | 7             | 0           | 3.823731                | -1.217826 | -2.054269 |
| 4             | 7             | 0           | 4.670808                | -2.334396 | 0.128523  |
| 5             | 7             | 0           | 5.641234                | -0.261483 | -1.124871 |
| 6             | 7             | 0           | 5.522311                | -0.280161 | 1.481016  |
| 7             | 7             | 0           | 4.998746                | 1.676433  | 0.496270  |
| 8             | 7             | 0           | 3.298606                | 0.817075  | 2.271086  |
| 9             | 7             | 0           | 2.433854                | 1.889757  | 0.063781  |
| 10            | 7             | 0           | 3.677381                | 1.349457  | -1.725902 |
| 11            | 7             | 0           | 1.419696                | -0.098084 | 1.454685  |
| 12            | 7             | 0           | 3.410141                | -1.758173 | 1.897518  |
| 13            | 5             | 0           | 2.219727                | 1.102955  | 1.263701  |
| 14            | 5             | 0           | 4.600075                | 0.871445  | 1.684288  |
| 15            | 5             | 0           | 5.660991                | 0.388221  | 0.159449  |
| 16            | 5             | 0           | 4.860781                | -1.531338 | -1.047157 |
| 17            | 5             | 0           | 3.215691                | -2.303940 | 0.522461  |
| 18            | 5             | 0           | 4.762957                | -1.504139 | 1.350499  |
| 19            | 5             | 0           | 2.668020                | -0.528892 | 2.073329  |
| 20            | 5             | 0           | 2.309794                | 1.054313  | -1.160511 |
| 21            | 5             | 0           | 3.851150                | 1.889177  | -0.356849 |
| 22            | 5             | 0           | 4.412655                | 0.125663  | -1.881221 |
| 23            | 5             | 0           | 2.487820                | -1.268624 | -1.437078 |
| 24            | 27            | 0           | 0.653048                | -0.975633 | 0.022007  |
| 25            | 6             | 0           | -1.434140               | 3.198859  | -0.285824 |
| 26            | 6             | 0           | -2.856301               | 3.352622  | -0.240022 |
| 27            | 6             | 0           | -3.590664               | 2.229596  | -0.031885 |
| 28            | 7             | 0           | -2.986296               | 1.011923  | 0.114985  |
| 29            | 6             | 0           | -1.597959               | 0.914691  | 0.022634  |
| 30            | 7             | 0           | -0.851275               | 1.996943  | -0.161351 |

|    |   |   |           |           |           |
|----|---|---|-----------|-----------|-----------|
| 31 | 6 | 0 | -3.776109 | -0.215720 | 0.351626  |
| 32 | 8 | 0 | -5.029848 | 0.114433  | 0.887328  |
| 33 | 6 | 0 | -6.115057 | -0.450154 | 0.085517  |
| 34 | 6 | 0 | -5.472084 | -1.588278 | -0.703243 |
| 35 | 6 | 0 | -4.079390 | -0.998978 | -0.952087 |
| 36 | 1 | 0 | -3.200455 | -0.841243 | 1.035903  |
| 37 | 9 | 0 | -4.116690 | -0.138890 | -2.014246 |
| 38 | 9 | 0 | -3.153818 | -1.957268 | -1.226596 |
| 39 | 6 | 0 | -7.252723 | -0.855465 | 0.999144  |
| 40 | 1 | 0 | -6.469489 | 0.318875  | -0.611206 |
| 41 | 8 | 0 | -7.832739 | 0.334986  | 1.516638  |
| 42 | 1 | 0 | -6.862077 | -1.502935 | 1.792379  |
| 43 | 1 | 0 | -7.975072 | -1.438079 | 0.408087  |
| 44 | 7 | 0 | -0.619556 | 4.246616  | -0.456036 |
| 45 | 1 | 0 | 0.378467  | 4.088126  | -0.447738 |
| 46 | 1 | 0 | -0.969258 | 5.188553  | -0.533550 |
| 47 | 8 | 0 | -5.367911 | -2.729054 | 0.123313  |
| 48 | 1 | 0 | -5.988981 | -1.790362 | -1.648467 |
| 49 | 1 | 0 | -4.869179 | -3.403586 | -0.359949 |
| 50 | 8 | 0 | -1.113724 | -0.257870 | 0.118006  |
| 51 | 1 | 0 | -8.499200 | 0.076055  | 2.166633  |
| 52 | 1 | 0 | -3.333941 | 4.317408  | -0.346240 |
| 53 | 1 | 0 | -4.667649 | 2.232561  | 0.058428  |
|    |   |   |           |           |           |

### Complex D

| Center Number | Atomic Number | Atomic Type | Coordinates (Angstroms) |           |           |
|---------------|---------------|-------------|-------------------------|-----------|-----------|
|               |               |             | X                       | Y         | Z         |
| 1             | 7             | 0           | 0.426061                | 0.553577  | -0.706100 |
| 2             | 7             | 0           | 0.603312                | -0.616238 | 1.302625  |
| 3             | 7             | 0           | 1.711388                | 1.724376  | 1.222261  |
| 4             | 7             | 0           | 2.574390                | 1.942046  | -1.211091 |
| 5             | 7             | 0           | 3.953466                | 1.706469  | 0.990522  |
| 6             | 7             | 0           | 4.701739                | 0.446415  | -1.164638 |
| 7             | 7             | 0           | 4.889936                | -0.715323 | 0.755202  |
| 8             | 7             | 0           | 3.681981                | -1.942358 | -1.191594 |
| 9             | 7             | 0           | 2.756002                | -2.145197 | 1.227414  |
| 10            | 7             | 0           | 2.930857                | -0.236560 | 2.398458  |
| 11            | 7             | 0           | 1.442151                | -2.058736 | -1.042325 |
| 12            | 7             | 0           | 2.410829                | 0.008359  | -2.338496 |
| 13            | 5             | 0           | 2.623275                | -2.295624 | -0.205329 |
| 14            | 5             | 0           | 4.579167                | -0.951935 | -0.679818 |

|    |    |   |           |           |           |
|----|----|---|-----------|-----------|-----------|
| 15 | 5  | 0 | 4.704254  | 0.690228  | 0.302056  |
| 16 | 5  | 0 | 2.735910  | 2.065474  | 0.208519  |
| 17 | 5  | 0 | 1.540443  | 0.893290  | -1.517459 |
| 18 | 5  | 0 | 3.454972  | 0.882363  | -1.749759 |
| 19 | 5  | 0 | 2.466511  | -1.327819 | -1.802202 |
| 20 | 5  | 0 | 1.867073  | -1.084706 | 1.767616  |
| 21 | 5  | 0 | 3.781939  | -1.130357 | 1.579685  |
| 22 | 5  | 0 | 2.895439  | 1.085960  | 1.836769  |
| 23 | 5  | 0 | 0.801728  | 0.700407  | 0.690911  |
| 24 | 27 | 0 | -0.060296 | -1.240866 | -0.343755 |
| 25 | 6  | 0 | -1.434012 | 3.768421  | 0.192662  |
| 26 | 6  | 0 | -1.577085 | 2.926030  | 1.354007  |
| 27 | 6  | 0 | -2.185500 | 1.733774  | 1.171396  |
| 28 | 7  | 0 | -2.678891 | 1.381708  | -0.060427 |
| 29 | 6  | 0 | -2.519326 | 2.265026  | -1.216953 |
| 30 | 7  | 0 | -1.900562 | 3.455411  | -1.000734 |
| 31 | 6  | 0 | -3.138612 | 0.064067  | -0.336562 |
| 32 | 8  | 0 | -2.125957 | -0.941973 | -0.009610 |
| 33 | 6  | 0 | -2.718023 | -2.111958 | 0.630486  |
| 34 | 6  | 0 | -4.226824 | -1.968673 | 0.431614  |
| 35 | 6  | 0 | -4.368869 | -0.442063 | 0.434051  |
| 36 | 1  | 0 | -3.352759 | 0.038402  | -1.406788 |
| 37 | 9  | 0 | -4.384800 | 0.001740  | 1.727995  |
| 38 | 9  | 0 | -5.527081 | -0.042749 | -0.155654 |
| 39 | 6  | 0 | -2.076872 | -3.333283 | -0.000509 |
| 40 | 1  | 0 | -2.467508 | -2.065359 | 1.695969  |
| 41 | 8  | 0 | -0.661974 | -3.109235 | 0.139396  |
| 42 | 1  | 0 | -2.365412 | -3.412701 | -1.051733 |
| 43 | 1  | 0 | -2.368286 | -4.244156 | 0.532579  |
| 44 | 7  | 0 | -0.803793 | 4.962028  | 0.321040  |
| 45 | 1  | 0 | -0.586503 | 5.448719  | -0.536752 |
| 46 | 1  | 0 | -0.218028 | 5.136363  | 1.121919  |
| 47 | 8  | 0 | -4.585282 | -2.493413 | -0.826789 |
| 48 | 1  | 0 | -4.797579 | -2.413313 | 1.257530  |
| 49 | 1  | 0 | -5.463267 | -2.155075 | -1.055469 |
| 50 | 8  | 0 | -2.955678 | 1.882412  | -2.291080 |
| 51 | 1  | 0 | -0.125003 | -3.680342 | -0.436360 |
| 52 | 1  | 0 | -1.170734 | 3.202797  | 2.317650  |
| 53 | 1  | 0 | -2.293755 | 1.008510  | 1.965508  |
|    |    |   |           |           |           |

### Complex E

| Center Number | Atomic Number | Atomic Type | Coordinates (Angstroms) |   |   |
|---------------|---------------|-------------|-------------------------|---|---|
|               |               |             | X                       | Y | Z |

|    |    |   |           |           |           |
|----|----|---|-----------|-----------|-----------|
| 1  | 7  | 0 | 1.514060  | -0.145806 | -1.402436 |
| 2  | 7  | 0 | 3.541177  | 0.060546  | -2.359127 |
| 3  | 7  | 0 | 3.133395  | -2.186994 | -1.130482 |
| 4  | 7  | 0 | 1.947541  | -1.462002 | 1.112682  |
| 5  | 7  | 0 | 4.346151  | -2.389649 | 0.748180  |
| 6  | 7  | 0 | 3.933294  | -0.480417 | 2.450094  |
| 7  | 7  | 0 | 5.822871  | -0.297776 | 1.237318  |
| 8  | 7  | 0 | 4.269403  | 1.794602  | 1.251778  |
| 9  | 7  | 0 | 5.452673  | 1.086942  | -0.942638 |
| 10 | 7  | 0 | 5.529012  | -1.148343 | -1.207549 |
| 11 | 7  | 0 | 2.981113  | 1.902491  | -0.595672 |
| 12 | 7  | 0 | 1.877839  | 0.820588  | 1.563844  |
| 13 | 5  | 0 | 4.427317  | 1.785452  | -0.215438 |
| 14 | 5  | 0 | 4.768170  | 0.569066  | 1.826761  |
| 15 | 5  | 0 | 4.796495  | -1.320858 | 1.594972  |
| 16 | 5  | 0 | 2.923607  | -2.158560 | 0.333451  |
| 17 | 5  | 0 | 2.572800  | -0.414255 | 1.917558  |
| 18 | 5  | 0 | 2.839724  | 1.603536  | 0.874350  |
| 19 | 5  | 0 | 4.850375  | 0.032663  | -1.801539 |
| 20 | 5  | 0 | 2.577920  | 0.834308  | -1.522852 |
| 21 | 5  | 0 | 5.881489  | -0.126497 | -0.188920 |
| 22 | 5  | 0 | 4.541225  | -2.063907 | -0.684128 |
| 23 | 5  | 0 | 2.638458  | -0.988728 | -1.779483 |
| 24 | 28 | 0 | 0.775729  | -0.215070 | 0.366121  |
| 25 | 6  | 0 | -0.905709 | 2.303558  | -0.446980 |
| 26 | 6  | 0 | -2.244905 | 2.793684  | -0.625382 |
| 27 | 6  | 0 | -3.276758 | 1.952327  | -0.368964 |
| 28 | 7  | 0 | -3.057754 | 0.671478  | 0.056900  |
| 29 | 6  | 0 | -1.753869 | 0.204215  | 0.239440  |
| 30 | 7  | 0 | -0.714404 | 1.054456  | -0.004734 |
| 31 | 6  | 0 | -4.165009 | -0.258769 | 0.297696  |
| 32 | 8  | 0 | -5.288945 | 0.448868  | 0.759383  |
| 33 | 6  | 0 | -6.506088 | -0.011139 | 0.097886  |
| 34 | 6  | 0 | -6.113969 | -1.281567 | -0.661375 |
| 35 | 6  | 0 | -4.651044 | -0.972986 | -0.980692 |
| 36 | 1  | 0 | -3.805281 | -0.999286 | 1.016077  |
| 37 | 9  | 0 | -4.582729 | -0.118357 | -2.047902 |
| 38 | 9  | 0 | -3.928544 | -2.081306 | -1.280587 |
| 39 | 6  | 0 | -7.610132 | -0.188500 | 1.122045  |
| 40 | 1  | 0 | -6.812271 | 0.761715  | -0.617584 |
| 41 | 8  | 0 | -8.005500 | 1.108746  | 1.537586  |
| 42 | 1  | 0 | -7.229174 | -0.799744 | 1.948177  |
| 43 | 1  | 0 | -8.438981 | -0.738429 | 0.647943  |
| 44 | 7  | 0 | 0.143486  | 3.087868  | -0.704061 |
| 45 | 1  | 0 | 1.106168  | 2.753372  | -0.640093 |

|    |   |   |           |           |           |
|----|---|---|-----------|-----------|-----------|
| 46 | 1 | 0 | -0.007447 | 4.017374  | -1.061523 |
| 47 | 8 | 0 | -6.188816 | -2.391250 | 0.208722  |
| 48 | 1 | 0 | -6.700954 | -1.418347 | -1.579178 |
| 49 | 1 | 0 | -5.730940 | -3.133732 | -0.211120 |
| 50 | 8 | 0 | -1.513416 | -0.950803 | 0.612081  |
| 51 | 1 | 0 | -8.546387 | 1.019303  | 2.331615  |
| 52 | 1 | 0 | -2.426932 | 3.808772  | -0.952847 |
| 53 | 1 | 0 | -4.315330 | 2.241511  | -0.453007 |
|    |   |   |           |           |           |

## Complex F

| Center Number | Atomic Number | Atomic Type | Coordinates (Angstroms) |           |           |
|---------------|---------------|-------------|-------------------------|-----------|-----------|
|               |               |             | X                       | Y         | Z         |
| 1             | 7             | 0           | -0.619638               | -1.389700 | 1.024918  |
| 2             | 7             | 0           | -2.344502               | -0.850656 | 2.378358  |
| 3             | 7             | 0           | -3.008431               | -2.222841 | 0.276981  |
| 4             | 7             | 0           | -1.756212               | -1.217303 | -1.830182 |
| 5             | 7             | 0           | -4.271827               | -1.077530 | -1.191430 |
| 6             | 7             | 0           | -3.025269               | 1.025913  | -2.061505 |
| 7             | 7             | 0           | -4.580783               | 1.409815  | -0.479502 |
| 8             | 7             | 0           | -2.217439               | 2.413266  | -0.026622 |
| 9             | 7             | 0           | -3.590940               | 1.382388  | 1.930325  |
| 10            | 7             | 0           | -4.677562               | -0.487390 | 1.306324  |
| 11            | 7             | 0           | -1.039188               | 1.169721  | 1.425464  |
| 12            | 7             | 0           | -0.627340               | 0.680486  | -1.142338 |
| 13            | 5             | 0           | -2.358379               | 1.837915  | 1.336260  |
| 14            | 5             | 0           | -3.244878               | 1.917021  | -0.899908 |
| 15            | 5             | 0           | -4.176049               | 0.339436  | -1.429375 |
| 16            | 5             | 0           | -2.900923               | -1.661422 | -1.092033 |
| 17            | 5             | 0           | -1.812760               | 0.241449  | -1.878708 |
| 18            | 5             | 0           | -1.056802               | 1.466509  | -0.016806 |
| 19            | 5             | 0           | -3.523363               | -0.086531 | 2.155464  |
| 20            | 5             | 0           | -1.119183               | -0.242474 | 1.767714  |
| 21            | 5             | 0           | -4.534306               | 0.929521  | 0.876946  |
| 22            | 5             | 0           | -4.231382               | -1.370643 | 0.260726  |
| 23            | 5             | 0           | -2.010817               | -1.759880 | 1.241124  |
| 24            | 28            | 0           | -0.140142               | -1.110077 | -0.855758 |
| 25            | 6             | 0           | 2.385804                | 3.798081  | -0.433083 |
| 26            | 6             | 0           | 2.669880                | 2.929254  | -1.545827 |
| 27            | 6             | 0           | 2.786534                | 1.608927  | -1.272081 |
| 28            | 7             | 0           | 2.666695                | 1.151816  | 0.011939  |
| 29            | 6             | 0           | 2.451672                | 2.066952  | 1.129804  |

|    |   |   |           |           |           |
|----|---|---|-----------|-----------|-----------|
| 30 | 7 | 0 | 2.281277  | 3.379998  | 0.815053  |
| 31 | 6 | 0 | 2.745525  | -0.239250 | 0.334602  |
| 32 | 8 | 0 | 1.992314  | -1.034903 | -0.617588 |
| 33 | 6 | 0 | 2.558614  | -2.386777 | -0.708892 |
| 34 | 6 | 0 | 3.838722  | -2.386701 | 0.143081  |
| 35 | 6 | 0 | 4.133773  | -0.886481 | 0.238103  |
| 36 | 1 | 0 | 2.360945  | -0.356190 | 1.350021  |
| 37 | 9 | 0 | 4.780050  | -0.479801 | -0.897289 |
| 38 | 9 | 0 | 4.922612  | -0.590228 | 1.301689  |
| 39 | 6 | 0 | 1.492136  | -3.367388 | -0.260194 |
| 40 | 1 | 0 | 2.796947  | -2.541264 | -1.765416 |
| 41 | 8 | 0 | 0.347584  | -3.063631 | -1.092054 |
| 42 | 1 | 0 | 1.237901  | -3.209064 | 0.788451  |
| 43 | 1 | 0 | 1.815694  | -4.398308 | -0.433375 |
| 44 | 7 | 0 | 2.230677  | 5.127785  | -0.653083 |
| 45 | 1 | 0 | 1.902797  | 5.681417  | 0.124604  |
| 46 | 1 | 0 | 2.086152  | 5.480603  | -1.584704 |
| 47 | 8 | 0 | 3.558003  | -2.915790 | 1.417879  |
| 48 | 1 | 0 | 4.661305  | -2.912152 | -0.359807 |
| 49 | 1 | 0 | 4.261613  | -2.639013 | 2.022987  |
| 50 | 8 | 0 | 2.441977  | 1.598418  | 2.255779  |
| 51 | 1 | 0 | -0.421742 | -3.572208 | -0.791049 |
| 52 | 1 | 0 | 2.753602  | 3.299010  | -2.559536 |
| 53 | 1 | 0 | 2.957385  | 0.862238  | -2.035693 |
|    |   |   |           |           |           |
